# Supplementary material for: Pericentromeric satellite lncRNAs are induced in cancer-associated fibroblasts and regulate their functions in lung tumorigenesis
Source: PubMed Central journal article supplement (PMC9837065; doi:10.1038/s41419-023-05553-1), 2023-01-12
Supplement: 41419_2023_5553_MOESM2_ESM.pdf [file 41419_2023_5553_MOESM2_ESM.pdf]

**A**

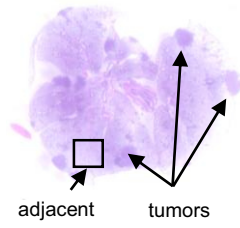

**B**

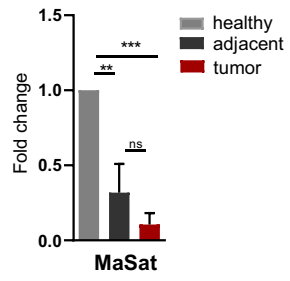

**C**

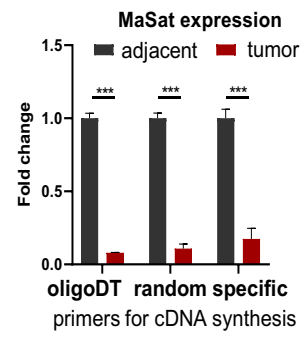

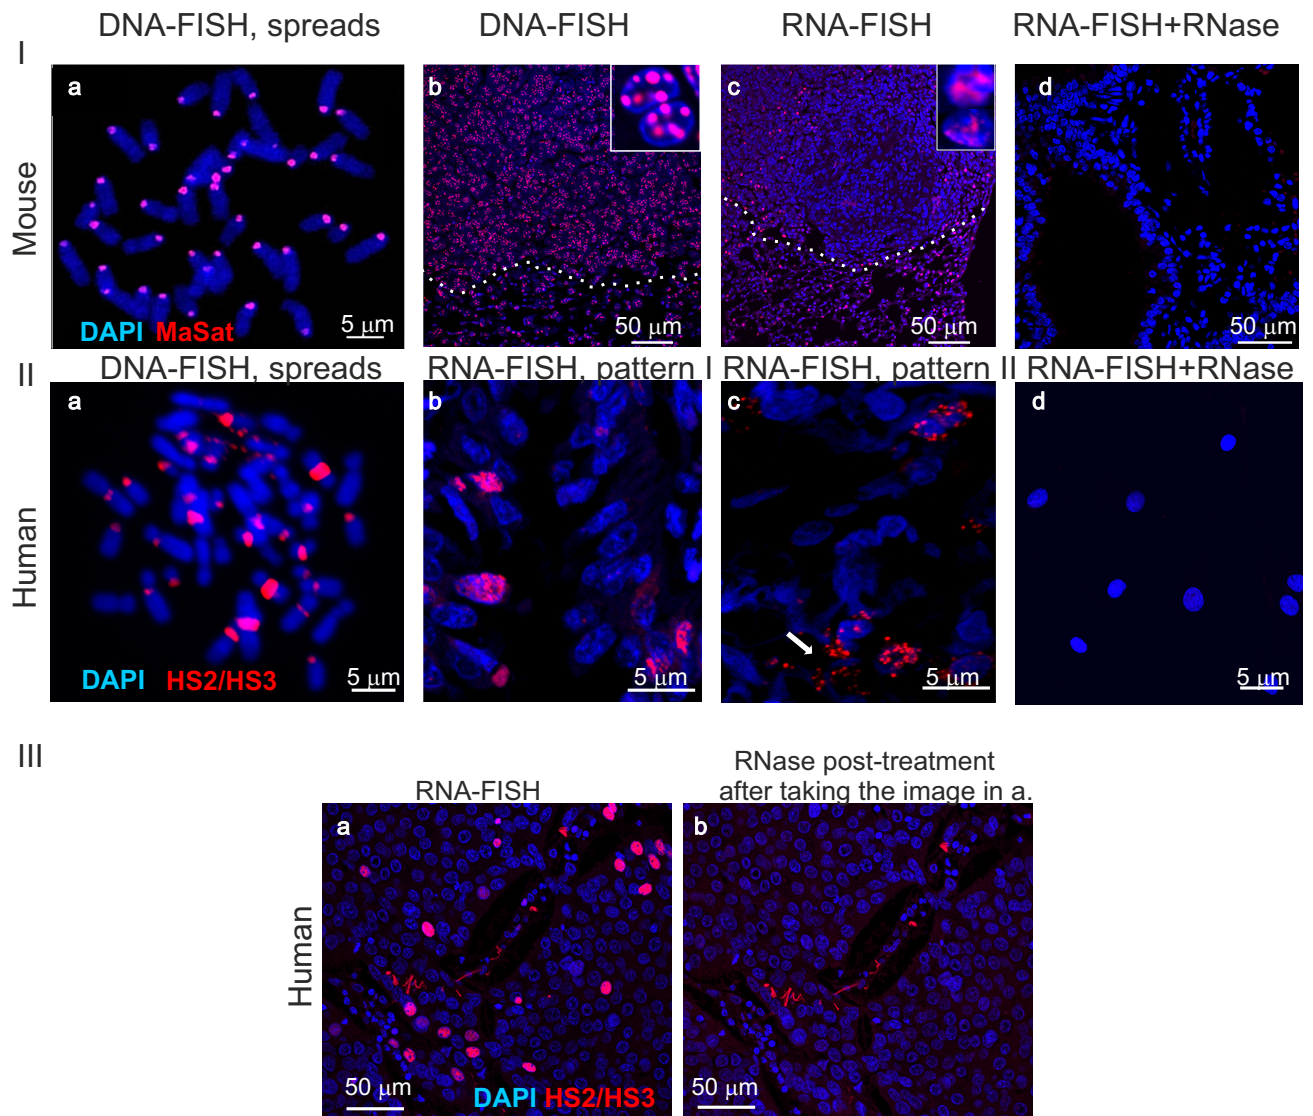

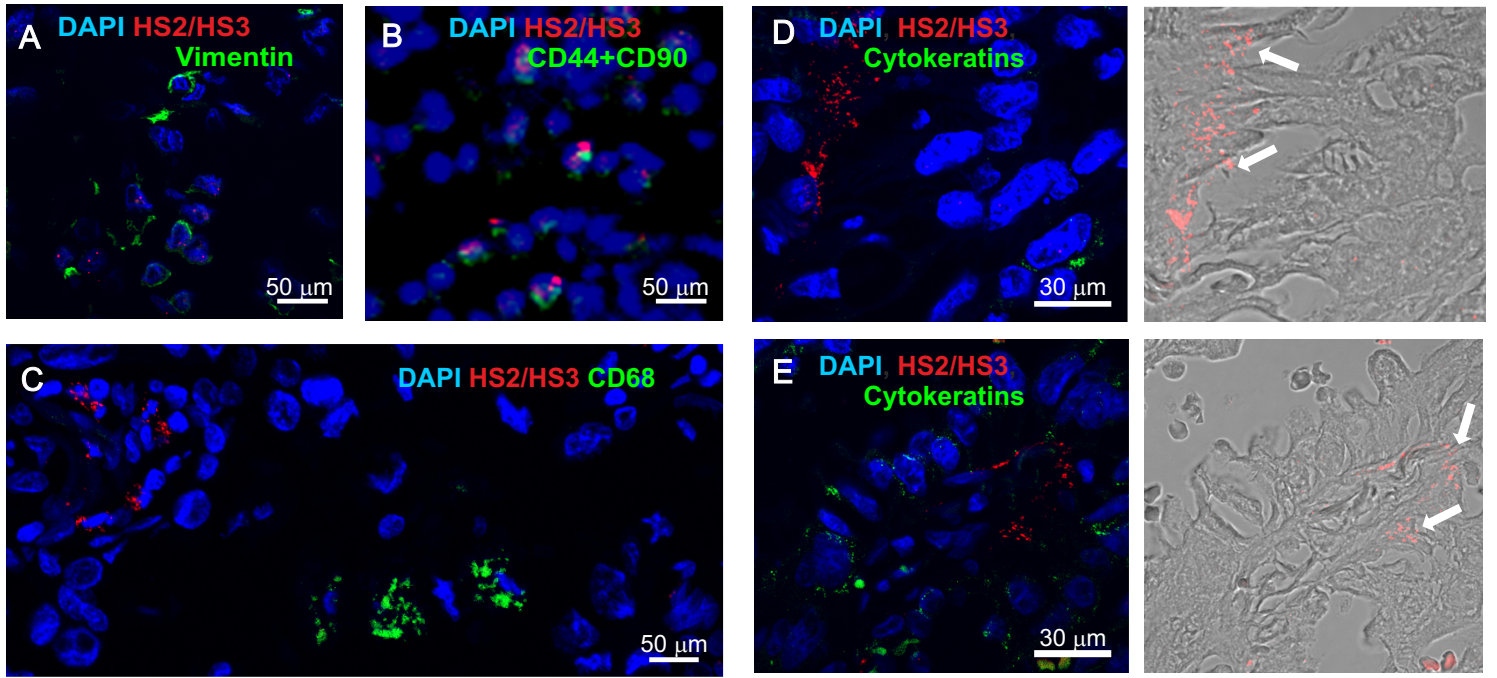

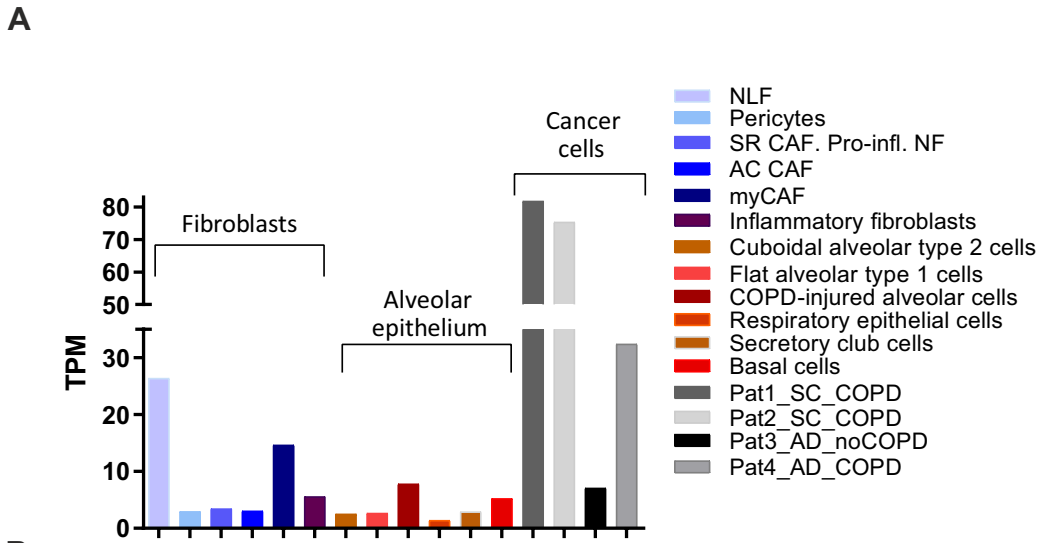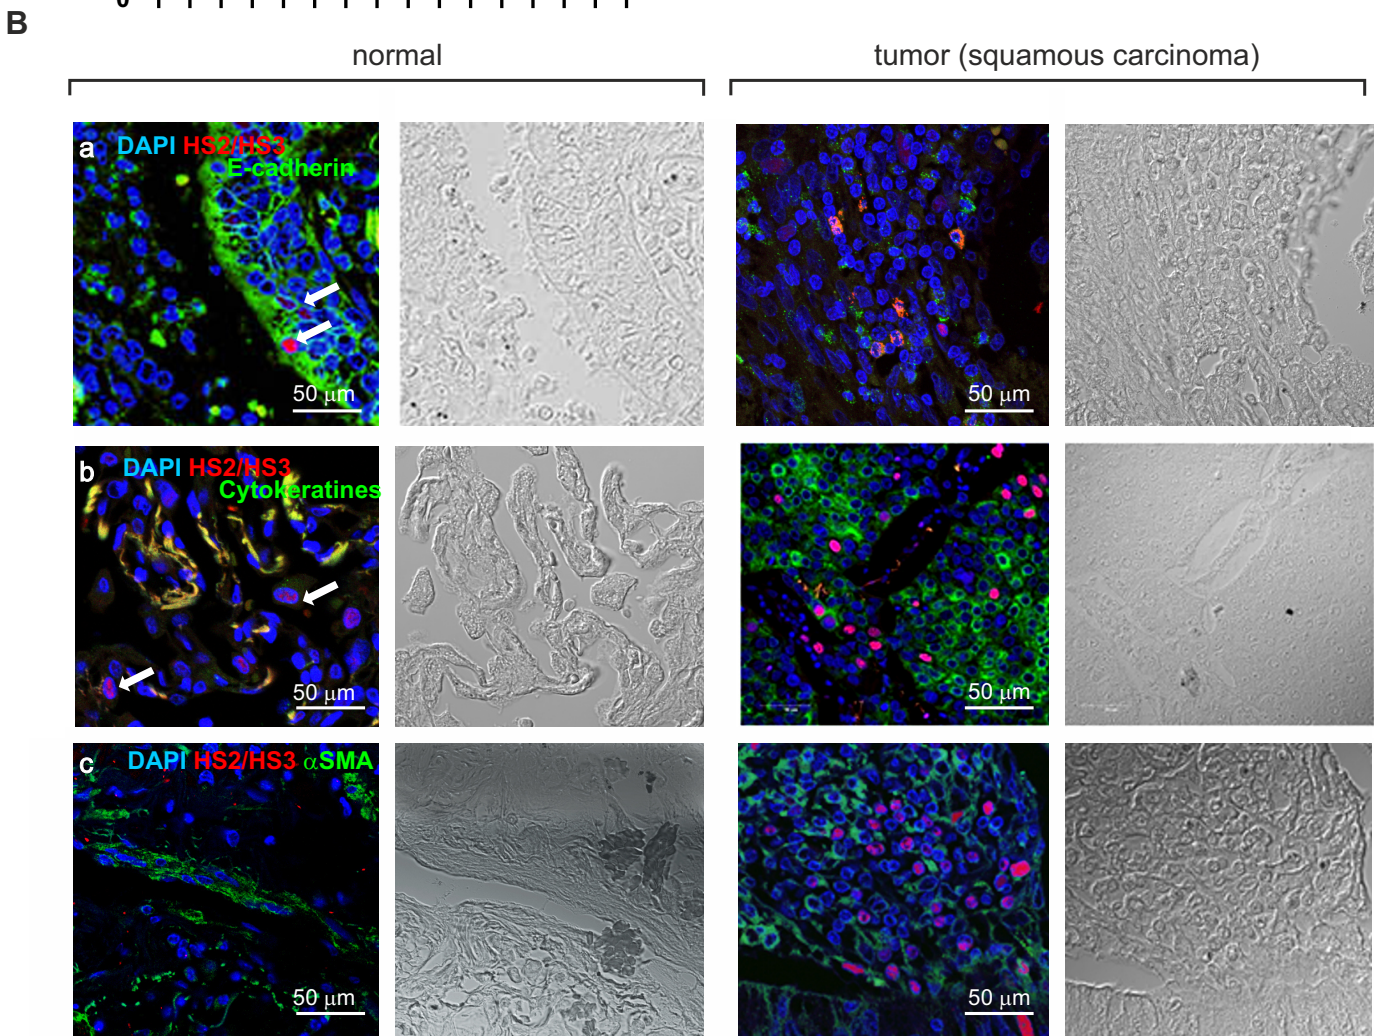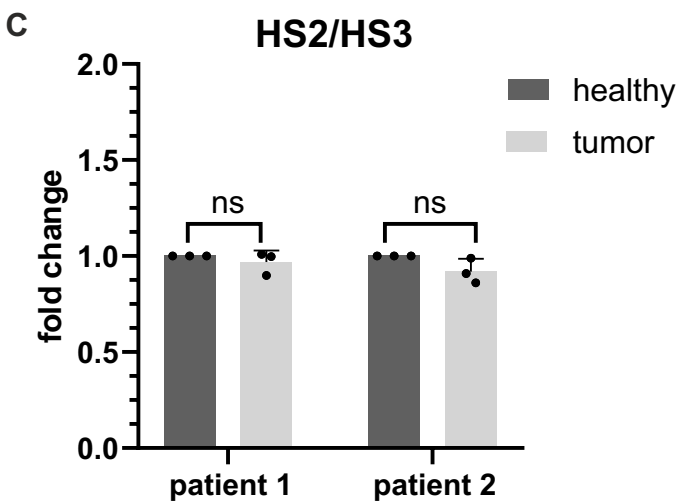

**A**

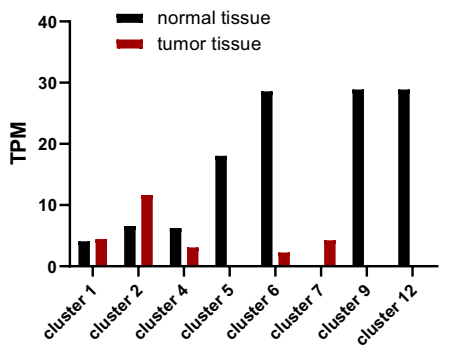

cluster 1 - macrophages  
 cluster 2 - macrophages  
 cluster 4 - M1 macrophages  
 cluster 5 - Langerhans cells  
 cluster 6 - alveolar macrophages  
 cluster 7 - granulocytes  
 cluster 9 - mDC  
 cluster 12 - cross-pres DC

**B**

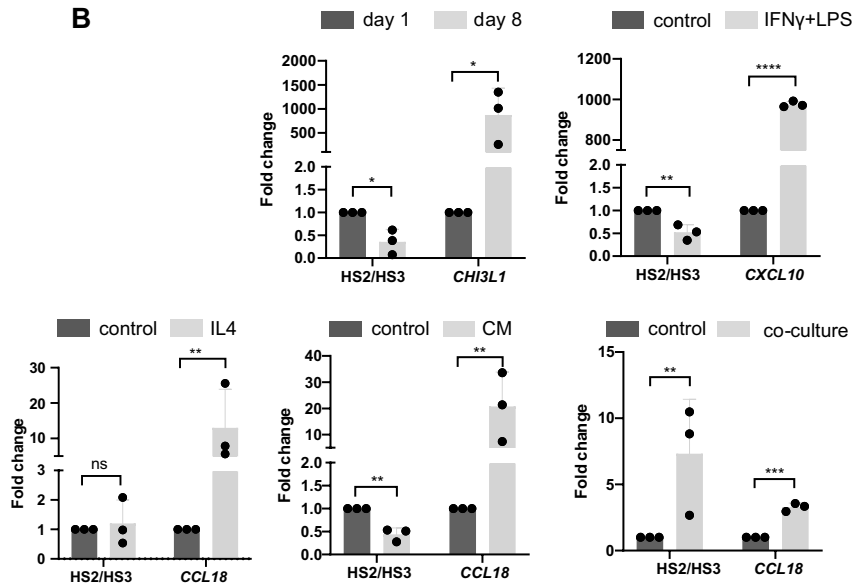

**C**

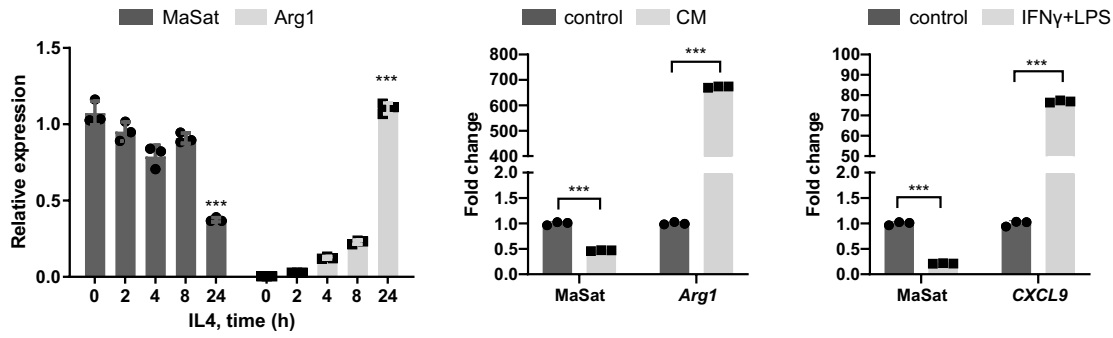

**A**  control  CM  control  co-culture

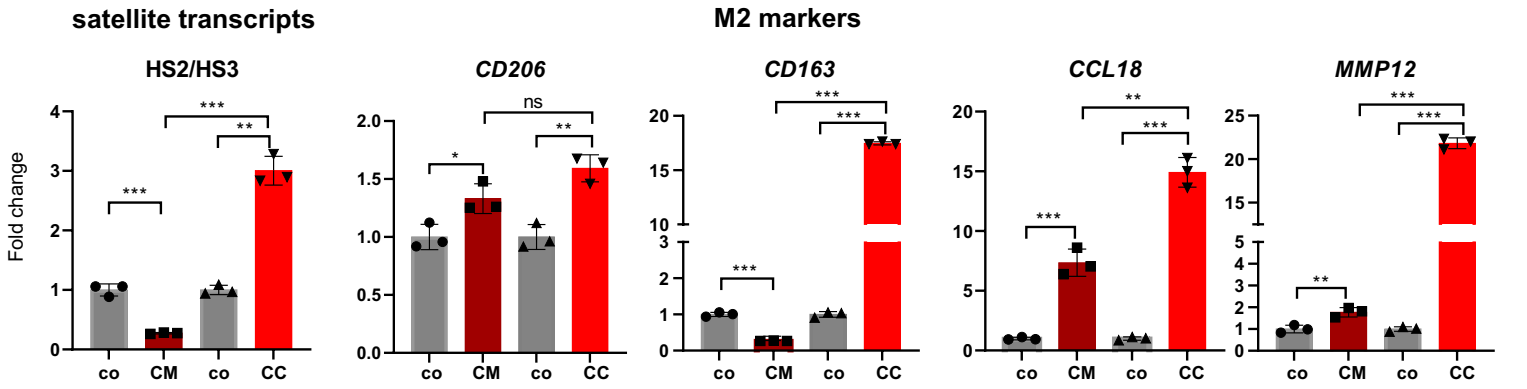

**M1 markers: inflammation**

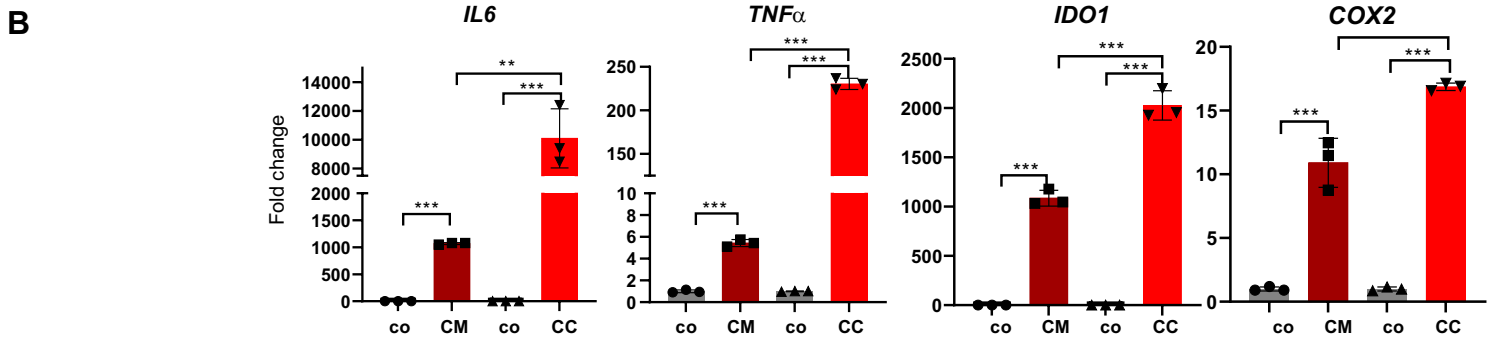

**M1 markers: IFN-response**

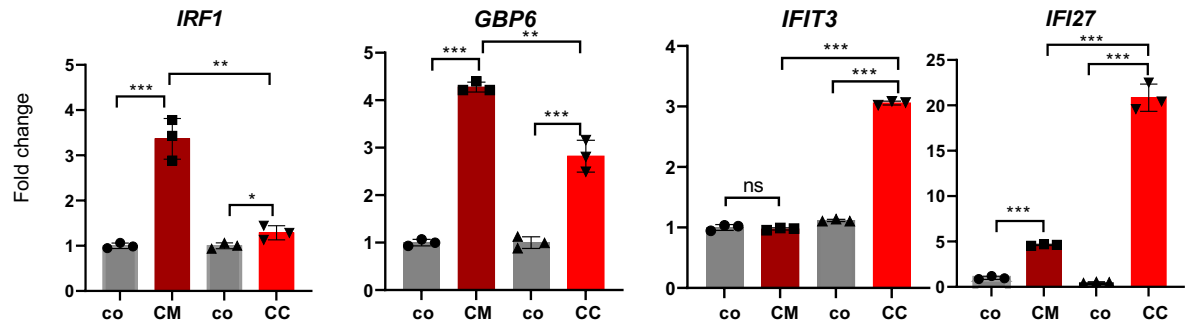

**M1 markers: T-cells migration/response**

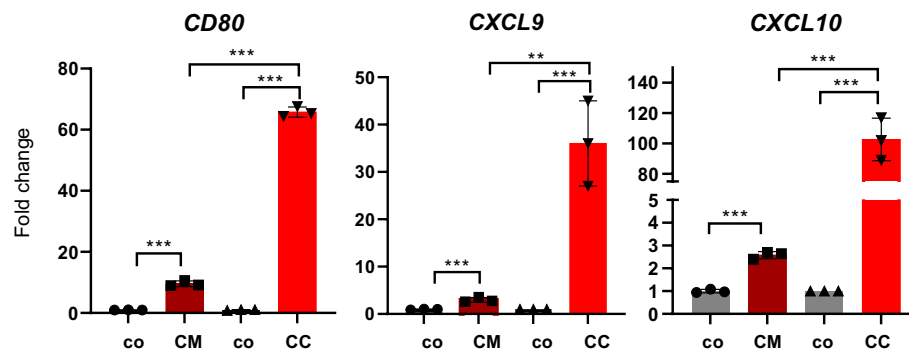

**A**

si-HS2/HS3  
bleomycin

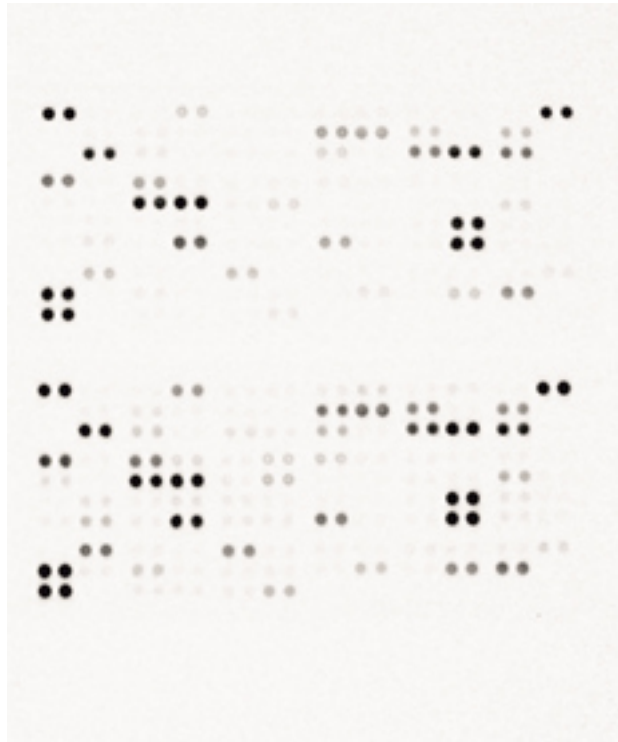

si-scr  
bleomycin

Cytokine array summary

|                       |     |
|-----------------------|-----|
| <b>Total</b>          | 106 |
| <b>up</b>             | 0   |
| <b>non-changed</b>    | 69  |
| <b>non-detectable</b> | 9   |
| <b>down</b>           | 28  |
